# Supplementary material
Source: Springer Nature journal article supplement (http://www.springermedizin.de/resource/supplementary/12937_2004_28_MOESM2_ESM.doc/25654288)

**
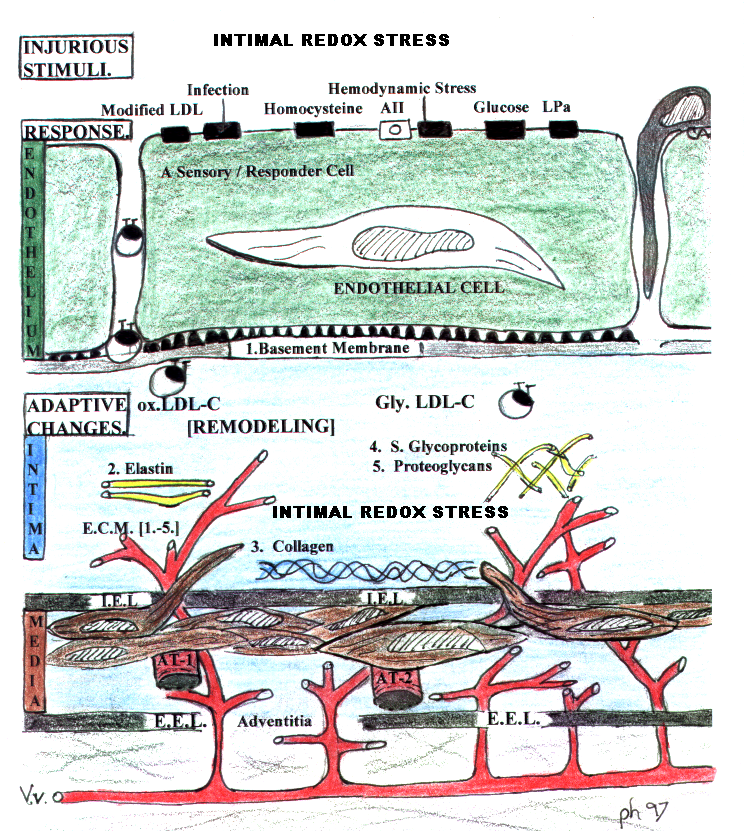
**

Supplement: MOESM2 [file 25654288]
